# Supplementary material for: FXYD5 promotes the growth of glioblastoma by targeting the PI3K/AKT/ACSL4 signaling axis
Source: Research Square preprint supplement (doi:10.21203/rs.3.rs-6967066/v1), 2025-07-23
Supplement: Supplementary file 1 [file 0f32bacea0dc0ad5307ca8c6.xlsx]

## Sheet: Sheet1
Figure3A													Figure3C
GAPDH			FXYD5		ACSL4								GAPDH			FXYD5		ACSL4
Name	Well	Ct	Well	Ct	Well	Ct							Name	Well	Ct	Well	Ct	Well	Ct
LV-shNC+Vector	A1	14.01	A4	18.36	A7	17.55							LV-shNC+Vector	E1	14.4	E4	19.03	E7	17.81
LV-shNC+Vector	A2	14.07	A5	18.46	A8	17.57							LV-shNC+Vector	E2	14.26	E5	19.03	E8	17.67
LV-shNC+Vector	A3	14.07	A6	18.41	A9	12.21							LV-shNC+Vector	E3	14.36	E6	19.05	E9	17.82
LV-shNC+OE-FXYD5	B1	14.14	B4	17.12	B7	16.55							LV-shNC+OE-FXYD5	F1	14.27	F4	17.43	F7	16.52
LV-shNC+OE-FXYD5	B2	14.11	B5	17.19	B8	16.59							LV-shNC+OE-FXYD5	F2	14.24	F5	17.44	F8	16.58
LV-shNC+OE-FXYD5	B3	14.15	B6	17.2	B9	16.53							LV-shNC+OE-FXYD5	F3	14.37	F6	17.54	F9	16.53
LV-shACSL4+Vector	C1	15.78	C4	18.47	C7	18.63							LV-shACSL4+Vector	G1	14.03	G4	18.95	G7	19.07
LV-shACSL4+Vector	C2	14.08	C5	18.48	C8	18.49							LV-shACSL4+Vector	G2	14.27	G5	18.85	G8	19.08
LV-shACSL4+Vector	C3	14.22	C6	18.53	C9	18.55							LV-shACSL4+Vector	G3	14.31	G6	18.79	G9	19.02
LV-shACSL4+OE-FXYD5	D1	14.07	D4	17.21	D7	17.87							LV-shACSL4+OE-FXYD5	H1	14.29	H4	17.42	H7	17.53
LV-shACSL4+OE-FXYD5	D2	14.11	D5	17.14	D8	17.78							LV-shACSL4+OE-FXYD5	H2	14.28	H5	17.39	H8	17.43
LV-shACSL4+OE-FXYD5	D3	14.11	D6	17.2	D9	17.64							LV-shACSL4+OE-FXYD5	H3	14.3	H6	17.42	H9	17.55
FXYD5
序号	样本名称	△CT	GAPDH Stdev	Gene Stdev	△△CT	2-△△CT	Average 2-△△CT	Relative Expression	Stdev				FXYD5
1	LV-shNC+Vector	4.31	0.034641	0.05	-0.05	1.03526	1.0004	1	0.034666				序号	样本名称	△CT	GAPDH Stdev	Gene Stdev	△△CT	2-△△CT	Average 2-△△CT	Relative Expression	Stdev
2		4.41			0.05	0.965936							1	LV-shNC+Vector	4.69	0.072111	0.011547	-0.00666667	1.00463	1.00002	1	0.00798537
3		4.36			0	1							2		4.69			-0.00666667	1.00463
4	LV-shNC+OE-FXYD5	2.98667	0.0208167	0.043589	-1.37333	2.59068	2.5032	2.5022	0.0762401				3		4.71			0.0133333	0.990801
5		3.05667			-1.30333	2.46798							4	LV-shNC+OE-FXYD5	3.13667	0.0680686	0.0608276	-1.56	2.94854	2.8696	2.86954	0.119527
6		3.06667			-1.29333	2.45094							5		3.14667			-1.55	2.92817
7	LV-shACSL4+Vector	4.32	0.943681	0.0321455	-0.04	1.02811	1.01179	1.01138	0.0224131				6		3.24667			-1.45	2.73208
8		4.33			-0.03	1.02101							7	LV-shACSL4+Vector	4.74667	0.151438	0.080829	0.05	0.965936	1.02681	1.02679	0.0571173
9		4.38			0.02	0.986233							8		4.64667			-0.05	1.03526
10	LV-shACSL4+OE-FXYD5	3.11333	0.023094	0.0378594	-1.24667	2.37293	2.41775	2.41678	0.063883				9		4.58667			-0.11	1.07923
11		3.04333			-1.31667	2.4909							10	LV-shACSL4+OE-FXYD5	3.13	0.01	0.0173205	-1.56667	2.9622	2.98294	2.98288	0.0359354
12		3.10333			-1.25667	2.38943							11		3.1			-1.59667	3.02444
ACSL4													12		3.13			-1.56667	2.9622
序号	样本名称	△CT	GAPDH Stdev	Gene Stdev	△△CT	2-△△CT	Average 2-△△CT	Relative Expression	Stdev				ACSL4
1	LV-shNC+Vector	3.5	0.034641	3.08884	-0.01	1.00696	1.00002	1	22.9704				序号	样本名称	△CT	GAPDH Stdev	Gene Stdev	△△CT	2-△△CT	Average 2-△△CT	Relative Expression	Stdev
2		3.52			0.01	0.993092							1	LV-shNC+Vector	3.47	0.072111	0.083865	0.0433333	0.97041	1.00114	1	0.0591241
3		-1.84			-5.35	40.7859							2		3.33			-0.0966667	1.0693
4	LV-shNC+OE-FXYD5	2.41667	0.0208167	0.0305505	-1.09333	2.13366	2.12414	2.12409	0.0448297				3		3.48			0.0533333	0.963707
5		2.45667			-1.05333	2.07532							4	LV-shNC+OE-FXYD5	2.22667	0.0680686	0.0321455	-1.2	2.2974	2.26091	2.25834	0.0500836
6		2.39667			-1.11333	2.16345							5		2.28667			-1.14	2.20381
7	LV-shACSL4+Vector	4.48	0.943681	0.0702377	0.97	0.510506	0.53755	0.537537	0.026073				6		2.23667			-1.19	2.28153
8		4.34			0.83	0.562529							7	LV-shACSL4+Vector	4.86667	0.151438	0.0321455	1.44	0.368567	0.372051	0.371628	0.0083368
9		4.4			0.89	0.539614							8		4.87667			1.45	0.366021
10	LV-shACSL4+OE-FXYD5	3.77333	0.023094	0.115902	0.263333	0.833161	0.899037	0.898678	0.0727765				9		4.81667			1.39	0.381565
11		3.68333			0.173333	0.886791							10	LV-shACSL4+OE-FXYD5	3.24	0.01	0.064291	-0.186667	1.13813	1.16014	1.16011	0.052276
12		3.54333			0.0333333	0.97716							11		3.14			-0.286667	1.21982
													12		3.26			-0.166667	1.12246
